# Supplementary material for: Cyano-bridged terbium(iii)–chromium(iii) bimetallic quasi-one-dimensional assembly exhibiting long-range magnetic ordering
Source: Royal Society of Chemistry journal article supplement (doi:10.1039/c1dt11655j), 2011-12-08
Supplement: c1dt11655j.pdf [file c1dt11655j.pdf]

## Supporting Information for:

### Cyano-Bridged Terbium(III)–Chromium(III) Bimetallic Quasi-One-Dimensional Assembly Exhibiting Long-Range Magnetic Ordering

Yang Guo, Gong-Feng Xu, Chao Wang, Ting-Ting Cao, Jinkui Tang,\* Zhan-Quan Liu, Yue Ma,\*  
Shi-Ping Yan, Peng Cheng, Dai-Zheng Liao

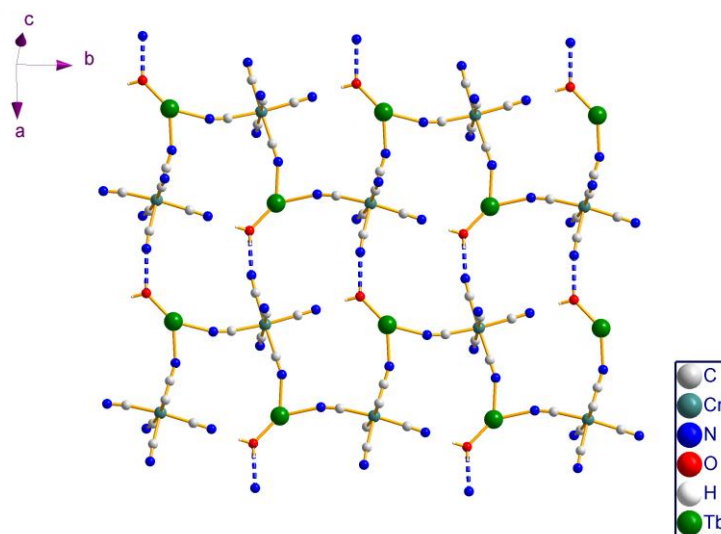

Figure S1. Weak interactions (O–H···N) between the 1D chains of **1** leading to 2D hydrogen-bonded network along *ab* plane.

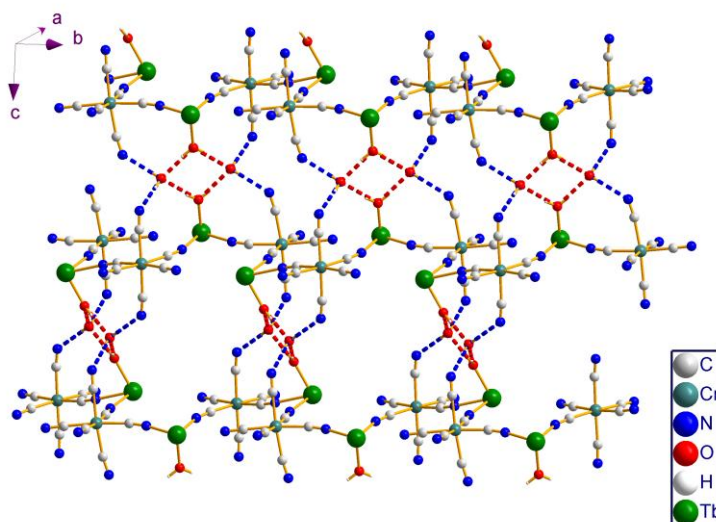

Figure S2. Weak interactions (O–H···N and O–H···O) between the 1D chains of **1** leading to 2D hydrogen-bonded network along *bc* plane.

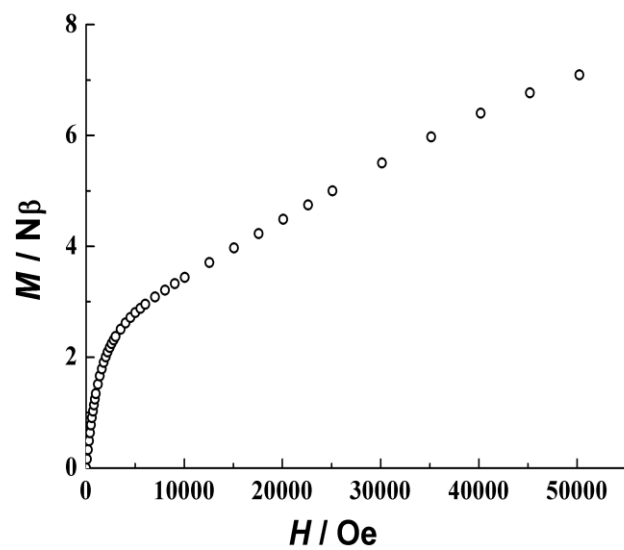

Figure S3. Magnetization versus magnetic field at 2 K for **1**.

Table S1. Selected Bond Lengths (Å) and Angles (deg) for **1**<sup>a</sup>.

|                   |            |                   |            |
|-------------------|------------|-------------------|------------|
| O(1)-Tb(1)        | 2.363(3)   | O(2)-Tb(1)        | 2.376(4)   |
| O(3)-Tb(1)        | 2.353(4)   | O(4)-Tb(1)        | 2.340(3)   |
| O(5)-Tb(1)        | 2.343(3)   | O(6)-Tb(1)        | 2.400(4)   |
| N(6)-Tb(1)#1      | 2.515(4)   | Tb(1)-N(6)#2      | 2.515(4)   |
| N(1)-Tb(1)        | 2.498(4)   |                   |            |
| C(1)-Cr(1)        | 2.084(4)   | C(2)-Cr(1)        | 2.082(5)   |
| C(3)-Cr(1)        | 2.072(4)   | C(4)-Cr(1)        | 2.064(5)   |
| C(5)-Cr(1)        | 2.071(5)   | C(6)-Cr(1)        | 2.098(4)   |
| O(1)-Tb(1)-N(1)   | 144.64(12) | O(2)-Tb(1)-N(1)   | 115.43(14) |
| O(3)-Tb(1)-N(1)   | 72.72(14)  | O(4)-Tb(1)-N(1)   | 74.40(12)  |
| O(5)-Tb(1)-N(1)   | 138.85(11) | O(6)-Tb(1)-N(1)   | 81.72(14)  |
| O(1)-Tb(1)-N(6)#2 | 78.35(12)  | O(2)-Tb(1)-N(6)#2 | 71.62(13)  |
| O(3)-Tb(1)-N(6)#2 | 111.98(15) | O(4)-Tb(1)-N(6)#2 | 141.53(12) |
| O(5)-Tb(1)-N(6)#2 | 144.73(12) | O(6)-Tb(1)-N(6)#2 | 82.33(13)  |
| O(1)-Tb(1)-O(2)   | 76.69(13)  | O(1)-Tb(1)-O(6)   | 71.94(13)  |
| O(2)-Tb(1)-O(6)   | 142.55(13) | O(3)-Tb(1)-O(6)   | 145.48(13) |
| O(3)-Tb(1)-O(1)   | 140.10(13) | O(3)-Tb(1)-O(2)   | 71.14(14)  |
| O(4)-Tb(1)-O(1)   | 116.39(12) | O(4)-Tb(1)-O(2)   | 144.02(13) |
| O(4)-Tb(1)-O(5)   | 71.74(12)  | O(4)-Tb(1)-O(6)   | 70.64(13)  |
| O(4)-Tb(1)-O(3)   | 80.25(14)  | O(5)-Tb(1)-O(3)   | 79.09(15)  |
| O(5)-Tb(1)-O(1)   | 73.36(12)  | O(5)-Tb(1)-O(2)   | 81.62(15)  |
| O(5)-Tb(1)-O(6)   | 107.79(16) | N(1)-Tb(1)-N(6)#2 | 75.05(12)  |
| C(1)-N(1)-Tb(1)   | 159.5(3)   | C(6)-N(6)-Tb(1)#1 | 163.4(3)   |
| N(1)-C(1)-Cr(1)   | 174.7(4)   | N(2)-C(2)-Cr(1)   | 174.6(5)   |
| N(3)-C(3)-Cr(1)   | 176.5(4)   | N(4)-C(4)-Cr(1)   | 178.6(5)   |
| N(5)-C(5)-Cr(1)   | 171.8(5)   | N(6)-C(6)-Cr(1)   | 170.9(4)   |
| C(1)-Cr(1)-C(6)   | 94.29(16)  | C(5)-Cr(1)-C(3)   | 91.57(19)  |
| C(2)-Cr(1)-C(1)   | 84.98(19)  | C(2)-Cr(1)-C(6)   | 92.60(18)  |
| C(3)-Cr(1)-C(2)   | 90.71(19)  | C(3)-Cr(1)-C(6)   | 88.99(16)  |
| C(4)-Cr(1)-C(1)   | 89.29(17)  | C(4)-Cr(1)-C(2)   | 91.9(2)    |
| C(4)-Cr(1)-C(3)   | 87.77(18)  | C(4)-Cr(1)-C(5)   | 92.83(19)  |
| C(5)-Cr(1)-C(1)   | 92.99(19)  | C(5)-Cr(1)-C(6)   | 82.75(18)  |

a. Symmetry transformations used to generate equivalent atoms: #1  $-x+2, y-1/2, -z+3/2$ ; #2  $-x+2, y+1/2, -z+3/2$ .

Table S2. Interatomic Distances and Angles for the Hydrogen Bonds in **1** (Å and deg)<sup>b</sup>.

| D–H···A       | d(D–H) | d(H···A) | d(D···A) | <(DHA) |
|---------------|--------|----------|----------|--------|
| O5–H5A···N3#3 | 0.848  | 1.926    | 2.772    | 174.93 |
| O5–H5B···N4#1 | 0.849  | 1.916    | 2.763    | 175.28 |
| O6–H6A···O7#5 | 0.848  | 2.047    | 2.885    | 169.79 |
| O6–H6B···O7#4 | 0.851  | 1.973    | 2.811    | 167.86 |
| O7–H7A···N5#3 | 0.851  | 2.055    | 2.907    | 179.25 |
| O7–H7B···N2#6 | 0.846  | 2.036    | 2.875    | 171.38 |

b. Symmetry transformations used to generate equivalent atoms: #1  $-x+2, y-1/2, -z+3/2$ ; #2  $-x+2, y+1/2, -z+3/2$ ; #3  $x-1, y, z$ ; #4  $-x+1, y+1/2, -z+3/2$ ; #5  $x+1, -y+3/2, z+1/2$ ; #6  $x-1, -y+3/2, z-1/2$ .
